# Supplementary material for: Regenerating Corticospinal Axons Innervate Phenotypically Appropriate Neurons within Neural Stem Cell Grafts
Source: PubMed Central journal article supplement — Cell Rep. Author manuscript; Available in PMC 2019 Apr 29. (PMC6487864; doi:10.1016/j.celrep.2019.01.099), 2019-02-26
Supplement: NIHMS1522759-supplement-1.pdf [file NIHMS1522759-supplement-1.pdf]

**Cell Reports, Volume 26**

**Supplemental Information**

**Regenerating Corticospinal Axons Innervate**

**Phenotypically Appropriate Neurons**

**within Neural Stem Cell Grafts**

**Hiromi Kumamaru, Paul Lu, Ephron S. Rosenzweig, Ken Kadoya, and Mark H. Tuszynski**

# Figure S1

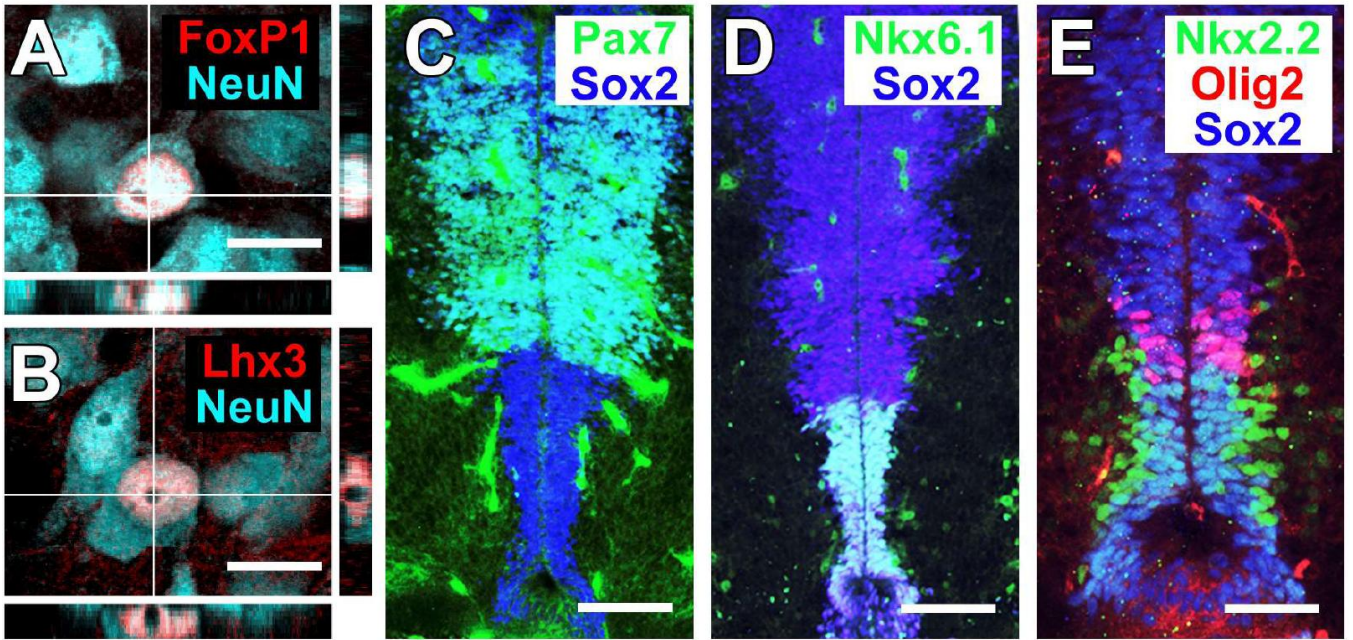

## Figure S1. Phenotypic Characterization of Rat Spinal Cord Neural Progenitor Cell Graft. Related to Figure 1.

(A, B) Confocal images of spinal cord neural progenitor cell-derived neurons two weeks post-grafting. NeuN<sup>+</sup> neurons express the ventral interneuronal marker FoxP1 (A) and Lhx3 (B). Scale bars, 20  $\mu$ m.

(C-E) Transverse sections of the rat E14 spinal cord. Sox2-labeled neural progenitor cells are present in the center of the spinal cord and express the dorsal marker Pax7 (C), the ventral marker Nkx6.1 (D), the ventral marker Nkx2.2 (E), and the motor neuron progenitor marker Olig2 (E). Overall, the rat E14 neural progenitor donor grafts are most abundantly populated by sensory interneuronal progenitors. Scale bars, 100  $\mu$ m (C, D) and 200  $\mu$ m (E).

# Figure S2

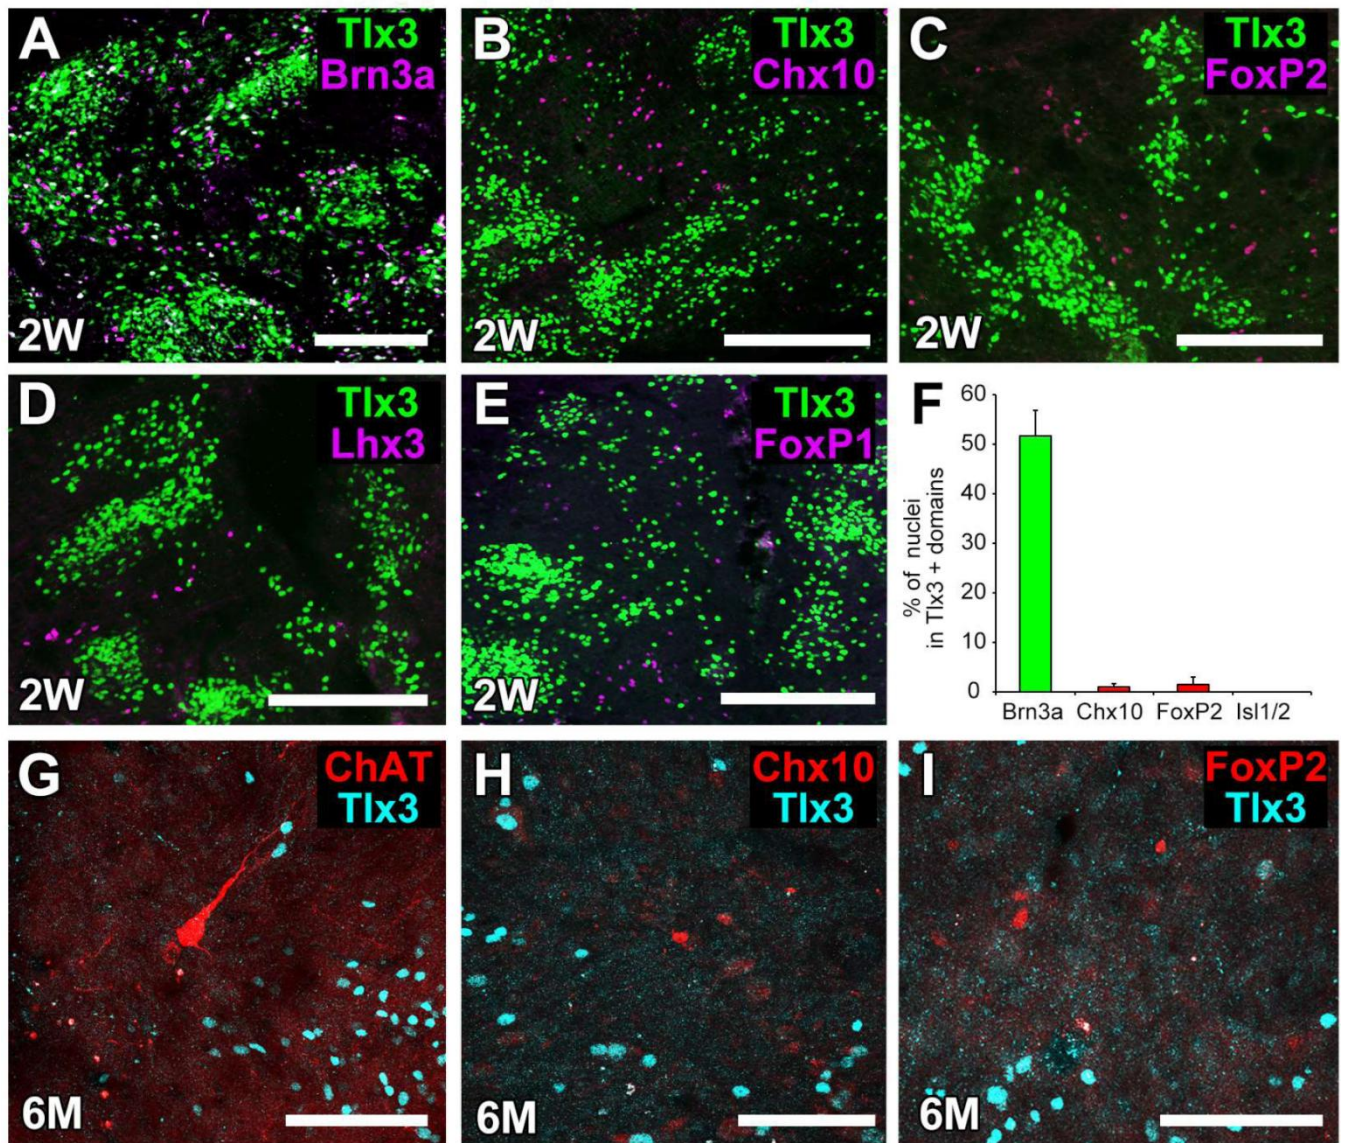

**Figure S2. The Spatial Distribution of Neuronal Subtypes in Rat Spinal Cord Neural Progenitor Cell Grafts. Related to Figure 2.**

(A) Cells expressing the sensory interneuronal marker Brn3a are clustered closely associated with Tlx3-expressing sensory interneuronal clusters. Dotted line indicates host-graft border. Scale bar, 250  $\mu$ m.

(B-E) Immunolabeling for the sensory interneuronal marker Tlx3 and the pre-motor interneuronal markers Chx10 (B), FoxP2 (C), Lhx3 (D), or FoxP1 (E) two-week post-graft, showing that graft-derived pre-motor interneurons exist outside of sensory interneuronal clusters (Tlx3). Scale bars, 250  $\mu$ m.

(F) Quantification of cell type-specific markers within Tlx3-expressing graft regions, showing that sensory interneurons (Brn3a) but few pre-motor neurons (Chx10, FoxP2, Isl1/2) are present within Tlx3 + clusters (n = 4 animals).

(G-I) Labeling for the sensory interneuronal marker Tlx3 and the motor neuronal marker ChAT (G), or the pre-motor interneuronal markers Chx10 (H) and FoxP2 (I), six-months post-grafting, showing motor populations located outside of sensory interneuronal clusters. Scale bars, 100  $\mu$ m. Mean  $\pm$  SEM.

# Figure S3

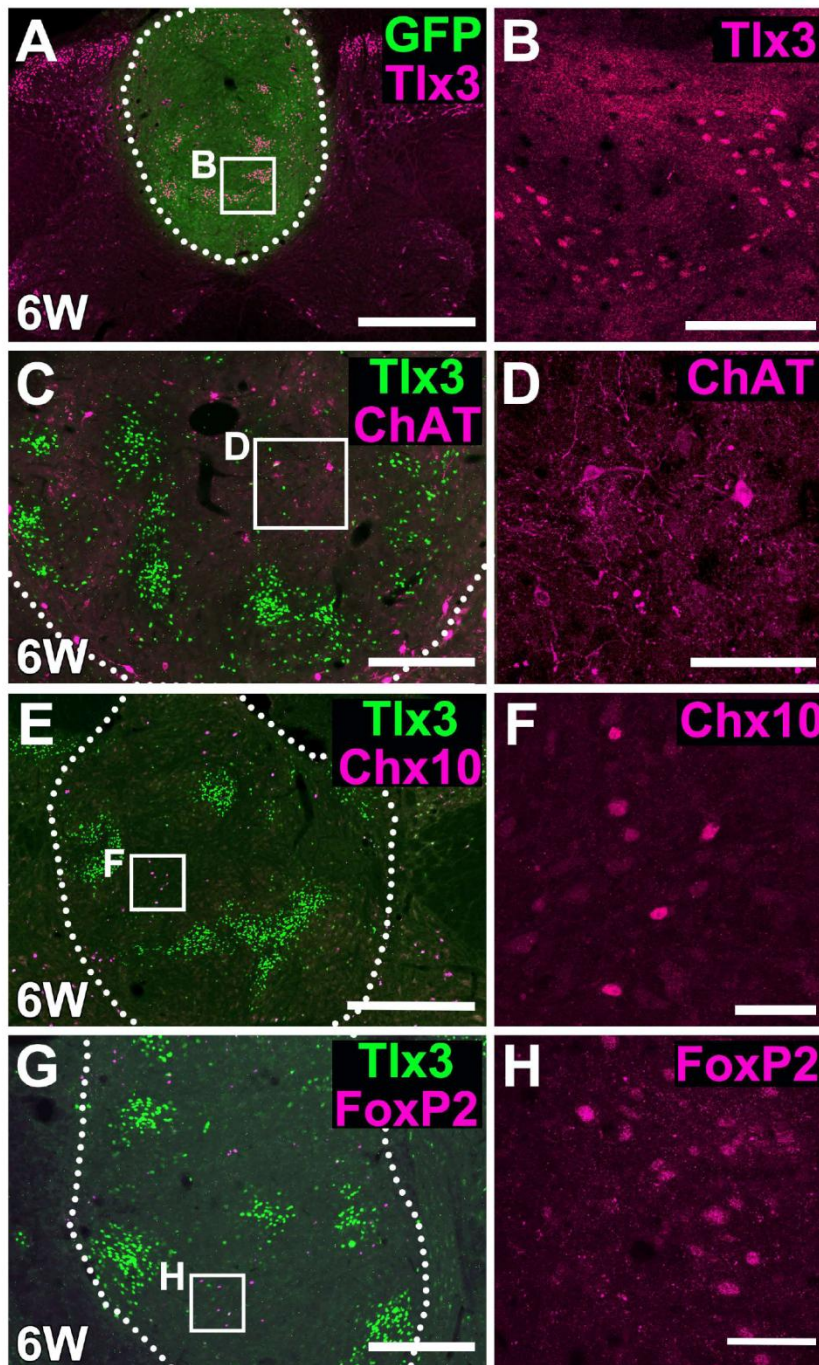

**Figure S3. Cross Sections of Rat Spinal Cord Neural Progenitor Cell Grafts. Related to Figure 2.**

(A, B) Transverse view of GFP-expressing NPC graft labeled with the sensory interneuronal marker Tlx3 six weeks post-grafting, showing clusters of Tlx3-expressing neurons. Scale bars, 1 mm (A) and 100 μm (B).

(C-H) Transverse views of NPC graft labeled for Tlx3 and Chat (motor neurons and V0c interneurons; C, D), Chx10 (V2a interneurons E, F), or FoxP2 (V1 interneurons; G, H), clearly showing that motor and pre-motor neurons exist in distinct domains from Tlx3-expressing sensory clusters. Scale bars, 250 μm (C), 100 μm (D), 500 μm (E, G), and 50 μm (F, H). No ChAT, Chx10, or FoxP2 + cells exist in the Tlx3-expressing sensory domains (n = 4).

# Figure S4

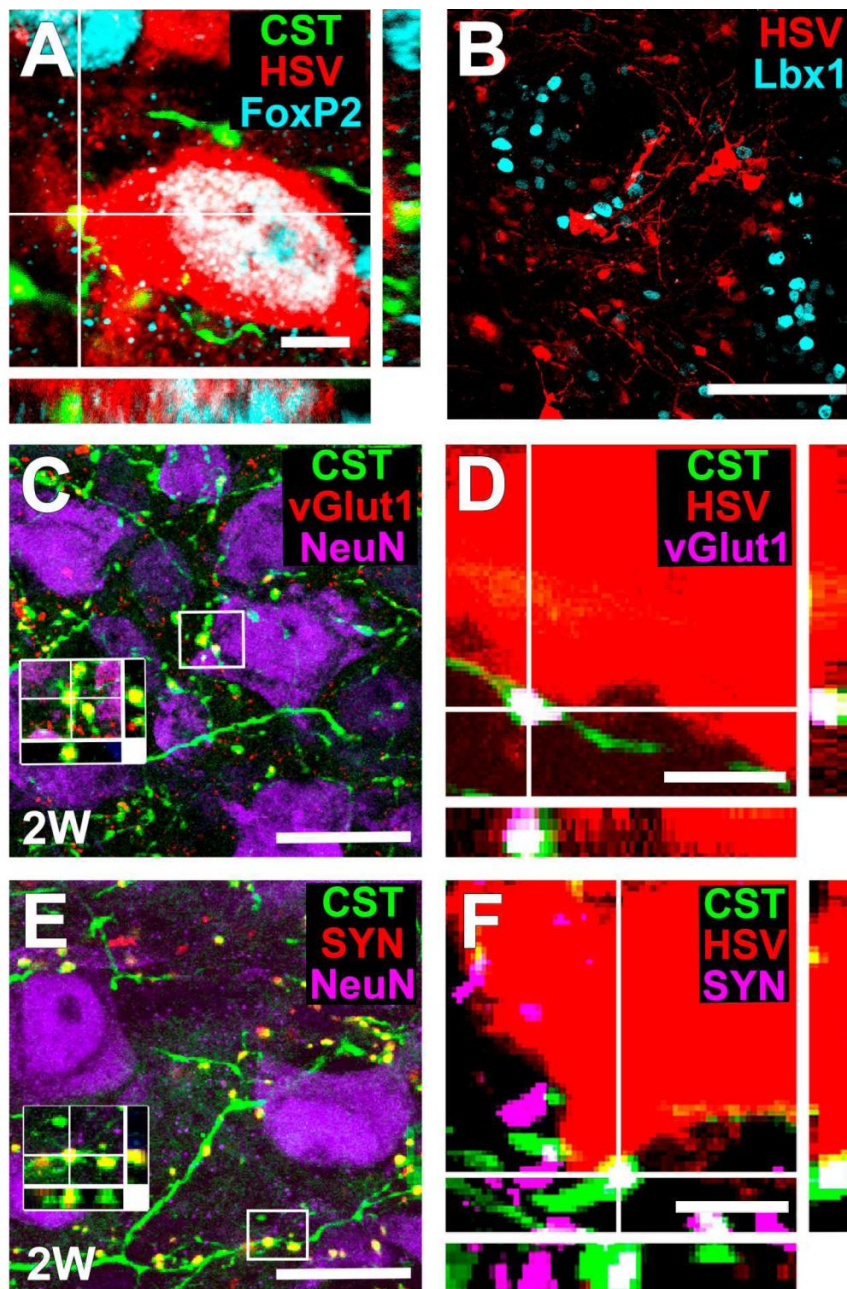

**Figure S4. Anterograde Transsynaptic Viral Tracing of Motor Projections into Rat Spinal Cord Neural Progenitor Cell Grafts, Six Months After Grafting. Related to Figure 4.**

(A) A confocal image shows transsynaptically labeled neurons in grafts following injections of HSV into host motor cortex. Cells transsynaptically labeled for tdTomato express V1 inhibitory motor neuronal marker FoxP2. Scale bar, 10  $\mu$ m.

(B) Trans-synaptically labeled tdTomato+ cells do not express the sensory interneuronal marker Lbx1. Scale bar, 100  $\mu$ m.

(C-F) GFP-labeled regenerating corticospinal axons in grafts express the presynaptic markers vGlut1 (C, D) or synaptophysin (SYN; E, F), two week after grafting. (D, F) GFP-labeled regenerating corticospinal axons that express vGlut1 (D) or SYN (F) are closely associated with tdTomato trans-synaptically labeled neurons. Scale bars, 20  $\mu$ m (C, E) and 5  $\mu$ m (D, F).

# Figure S5

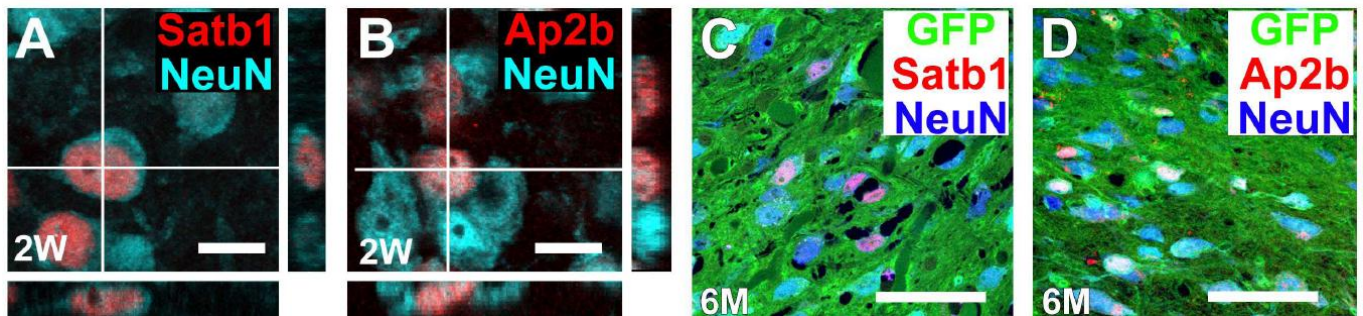

## Figure S5. Motor Synergy Encoder Neurons in Rat Spinal Cord Neural Progenitor Cell Grafts. Related to Figure 5.

(A, B) Confocal images of spinal cord neural progenitor cell graft two-week post-grafting, showing NeuN expressing graft derived neuron express the motor synergy encoder (MSE) neuronal marker s Satb1 or Ap2b. Scale bars, 20  $\mu\text{m}$ .

(C, D) Labeling of spinal cord neural progenitor cell-derived neurons six-month post-grafting. Graft-derived neurons (GFP+/NeuN+) still express the MSE neuronal markers Ap2b or Satb1, six months post-grafting. Scale bars, 100  $\mu\text{m}$ .

# Figure S6

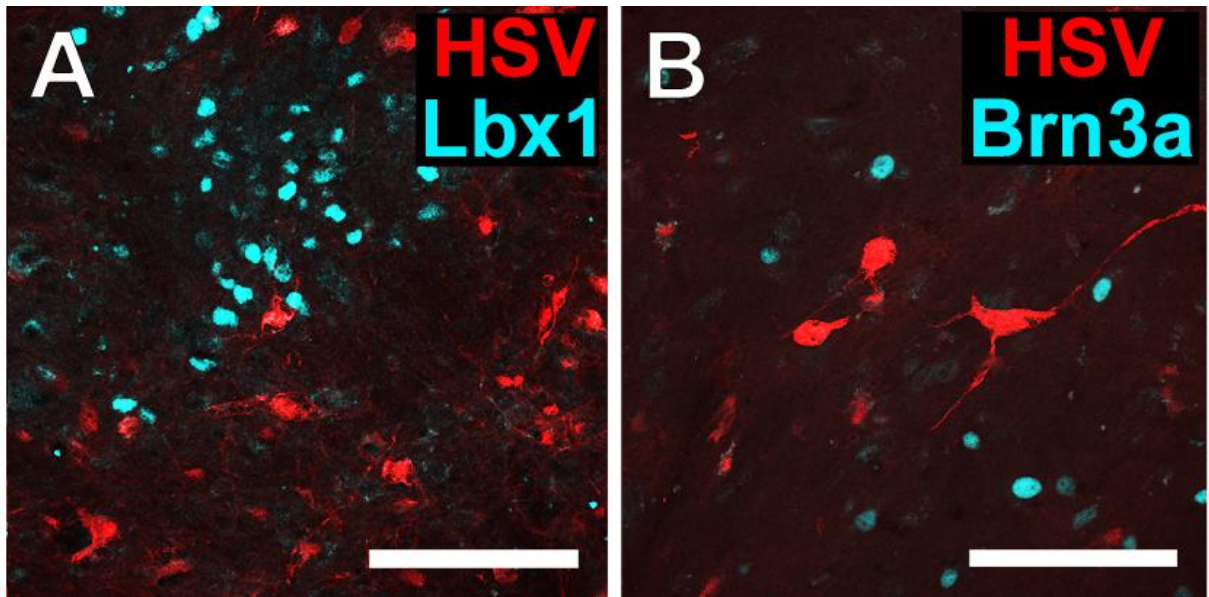

**Figure S6. Few Sensory Interneurons Transsynaptically Labeled with HSV. Related to Figure 5.**

(A, B) Double immunolabeling for sensory markers (Lbx1, A; Brn3a, B) and tdTomato (HSV), demonstrating that neurons transsynaptically labeled with HSV graft do not express sensory interneuronal markers, and are located in domains separate from sensory interneurons. Scale bars, 100  $\mu$ m.

**Table S1**

| Antibody            | Company                                                 | Catalogue# | Host       |
|---------------------|---------------------------------------------------------|------------|------------|
| Bhlhb5              | Gifted from Dr. Sarah Rose                              |            | Rat        |
| Brn3a               | Millipore                                               | MAB1585    | Mouse      |
| CaMKII              | Genetex                                                 | GTX61641   | Rabbit     |
| ChAT                | Millipore                                               | Ab144P     | Goat       |
| Chx10               | Abcam                                                   | ab16141    | Sheep      |
| Doublecortin (DCX)  | Santa Cruz Biotechnology                                | sc-8066    | Goat       |
| FoxP1               | Abcam                                                   | ab16445    | Rabbit     |
| FoxP2               | Abcam                                                   | ab16046    | Rabbit     |
| GABA                | Sigma                                                   | A2052      | Rabbit     |
| Islet 1/2           | Iowa Hybridoma Bank, DSHB                               | 39.4D5-c   | Mouse      |
| Lbx1                | Gifted from Dr. Thomas Müller and Dr. Carmen Birchmeier |            | Guinea pig |
| Lhx3                | Genetex                                                 | GTX14555   | Rabbit     |
| NeuN                | Millipore                                               | MAB377     | Mouse      |
| NeuN                | Biosensis                                               | R-3770-100 | Rabbit     |
| Nkx2.2              | Iowa Hybridoma Bank, DSHB                               | 74.5A5-c   | Mouse      |
| Nkx6.1              | Iowa Hybridoma Bank, DSHB                               | F55A12-c   | Mouse      |
| Olig2               | IBL                                                     | 18953      | Rabbit     |
| Pax2                | Life Technology                                         | 716000     | Rabbit     |
| Pax7                | Iowa Hybridoma Bank, DSHB                               | Pax7-c     | Mouse      |
| Prdm8               | Gifted from Dr. Sarah Rose                              |            | Guinea pig |
| RFP                 | Abcam                                                   | ab34771    | Rabbit     |
| mCherry             | Sicgen                                                  | AB0040     | Goat       |
| Satb1               | Santa Cruz Biotechnology                                | sc-376096  | Mouse      |
| Satb1               | Santa Cruz Biotechnology                                | sc-5989    | Goat       |
| Sox2                | Abcam                                                   | ab97959    | Rabbit     |
| Sox2                | Santa Cruz Biotechnology                                | sc-17320   | Goat       |
| Synaptophysin (SYN) | Novus bio                                               | NBP1-19222 | Mouse      |
| Tcfap2b (Ap2b)      | Santa Cruz Biotechnology                                | sc-8976    | Rabbit     |
| Tlx3                | Gifted from Dr. Thomas Müller and Dr. Carmen Birchmeier |            | Guinea pig |
| Tlx3                | Gifted from Dr. Thomas Müller and Dr. Carmen Birchmeier |            | Rabbit     |
| vGlut1              | Sigma                                                   | V0389-200  | Rabbit     |

**Table S1. List of primary antibodies used in this study. Related to STAR Methods**
